# Supplementary material
Source: publisher site journal article supplement (https://static.cambridge.org/content/id/urn:cambridge.org:id:article:S0016756820000448/resource/name/S0016756820000448supp001.docx)
Supplement: Supplementary file 1 [file S0016756820000448supp001.docx]

**Supplementary Material**

**Large trilobites in a stress-free Early Ordovician environment**

FARID SALEH1*, MURIEL VIDAL2, LUKÁŠ LAIBL3,4,5, PIERRE SANSJOFRE2, PIERRE GUERIAU3, FRANCESC PEREZ PERIS3, LORENZO LUSTRI3, VICTOIRE LUCAS2, BERTRAND LEFEBVRE1, BERNARD PITTET1, KHADIJA EL HARIRI6 and ALLISON C. DALEY3

*1Université de Lyon, Université Claude Bernard Lyon1, École Normale Supérieure de Lyon, CNRS, UMR5276, LGL-TPE, Villeurbanne, France*

*2Univ. Brest, CNRS, IUEM Institut Universitaire Européen de la Mer, UMR 6538 Laboratoire Géosciences Océan, Place Nicolas Copernic, 29280 Plouzané, France*

*3Institute of Earth Sciences, University of Lausanne, Géopolis, CH-1015 Lausanne, Switzerland*

*4The Czech Academy of Sciences, Institute of Geology, Rozvojová 269, 165 00 Prague 6, Czech Republic*

*5Institute of Geology and Palaeontology, Faculty of Science, Charles University, Albertov 6, Prague, 12843, Czech Republic*

*6Département des Sciences de la Terre, Faculté des Sciences et Techniques, Université Cadi-Ayyad, BP 549, 40000 Marrakesh, Morocco*

[*farid.saleh@univ-lyon1.fr](mailto:*farid.saleh@univ-lyon1.fr)

Short running title: Large Ordovician trilobites

| Complete trilobites sizes (cm) | | |
| --- | --- | --- |
| Tamegroute | Bou Izargane | Ouled Slimane |
| 4.9 | 9.8 | 18 |
| 3.3 | 13 | 19.1 |
| 6 | 14.2 | 21.5 |
| 6.2 | 16.1 | 23 |
| 3.7 | 8.5 | 24.2 |
| 2.2 | 3.7 | 26 |
| 2 | 4.1 | 26.7 |
| 2.8 | 3.8 | 27.2 |
| 2.9 | 6.2 | 28.4 |
| 4 | 3.9 | 28.5 |
| 4.8 | 0.9 | 29.7 |
| 3.1 | 5.6 | 30.1 |
| 3.1 | 9.3 | 31.3 |
| 3.7 | 4.2 | 31.6 |
| 4.1 |  | 31.9 |
|  |  | 33.4 |
|  |  | 33.7 |
|  |  | 34.2 |
|  |  | 24.1 |
|  |  | 33.5 |
|  |  | 35.2 |
|  |  | 36.4 |
|  |  | 37.3 |
|  |  | 38 |
|  |  | 39.2 |
|  |  | 39.6 |
|  |  | 41.7 |
|  |  | 42.9 |
|  |  | 43.2 |
|  |  | 47 |
|  |  | 49.1 |


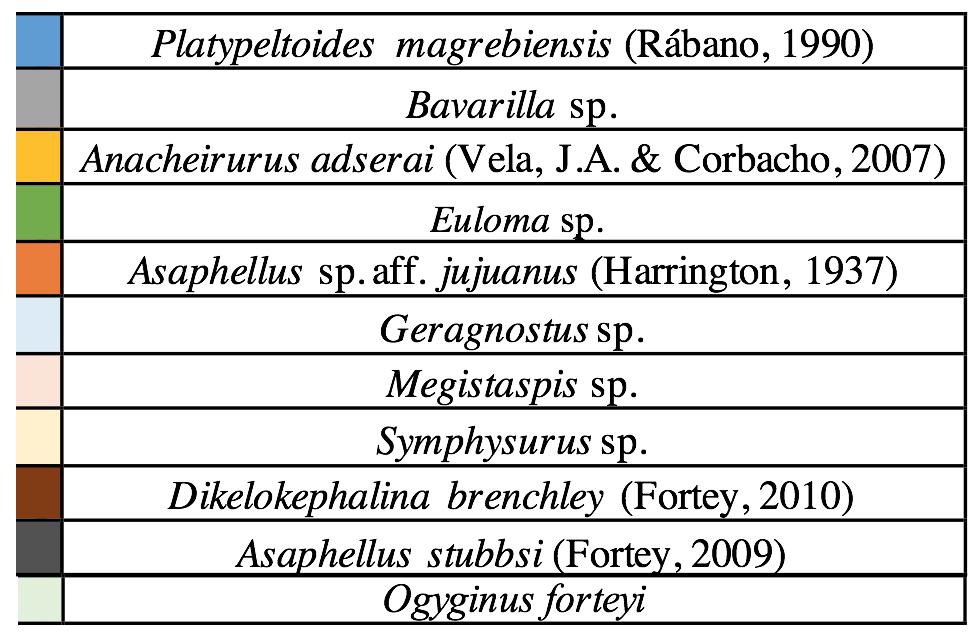


sp.

Table 1. Raw trilobites measurements in the studied localities.

| Summary statistics | | | | | |
| --- | --- | --- | --- | --- | --- |
| Tamegroute | | Bou Izargane | | Ouled Slimane | |
| N | 15 | N | 14 | N | 31 |
| Min | 2 | Min | 0,9 | Min | 18 |
| Max | 6,2 | Max | 16,1 | Max | 49,1 |
| Sum | 56,8 | Sum | 103,3 | Sum | 1005,7 |
| Mean | 3,786667 | Mean | 7,378571 | Mean | 32,44194 |
| Std. error | 0,3221751 | Std. error | 1,219853 | Std. error | 1,415633 |
| Variance | 1,556952 | Variance | 20,83258 | Variance | 62,12452 |
| Stand. dev | 1,247779 | Stand. dev | 4,564272 | Stand. dev | 7,881911 |
| Median | 3,7 | Median | 5,9 | Median | 31,9 |
| 25 prcntil | 2,9 | 25 prcntil | 3,875 | 25 prcntil | 26,7 |
| 75 prcntil | 4,8 | 75 prcntil | 10,6 | 75 prcntil | 38 |
| Skewness | 0,6465317 | Skewness | 0,6577487 | Skewness | 0,1820401 |
| Kurtosis | -0,1826851 | Kurtosis | -0,6027403 | Kurtosis | -0,4525136 |
| Geom. mean | 3,601623 | Geom. mean | 5,939102 | Geom. mean | 31,48845 |
| Coeff. var | 32,95191 | Coeff. var | 61,85848 | Coeff. var | 24,29544 |

Table 2. Summary statistics on trilobite sizes from the Tamgroute, Bou Izargane and Ouled Slimane.

| Normality test | | | | | |
| --- | --- | --- | --- | --- | --- |
| Tamegroute | | Bou Izargane | | Ouled Slimane | |
| N | 15 | N | 14 | N | 31 |
| Shapiro-Wilk W | 0,9424 | Shapiro-Wilk W | 0,9175 | Shapiro-Wilk W | 0,9879 |
| p(normal) | 0,4138 | p(normal) | 0,2021 | p(normal) | 0,9732 |
| Anderson-Darling A | 0,3422 | Anderson-Darling A | 0,5364 | Anderson-Darling A | 0,09692 |
| p(normal) | 0,4423 | p(normal) | 0,1385 | p(normal) | 0,9963 |
| p(Monte Carlo) | 0,4561 | p(Monte Carlo) | 0,1391 | p(Monte Carlo) | 0,9997 |
| Jarque-Bera JB | 0,9986 | Jarque-Bera JB | 1,18 | Jarque-Bera JB | 0,5749 |
| p(normal) | 0,6069 | p(normal) | 0,5545 | p(normal) | 0,7502 |
| p(Monte Carlo) | 0,361 | p(Monte Carlo) | 0,2449 | p(Monte Carlo) | 0,6932 |

Table 3. Normality tests for the studied sites showing that size distributions are normal.

| Significant differences | | | | | | | |
| --- | --- | --- | --- | --- | --- | --- | --- |
| Tamegroute vs Bou Izargane | | | | Bou Izargane vs Ouled slimane | | | |
| t : | 2,9361 | p (same mean): | 0,0067168 | t : | -11,047 | p (same mean): | 3,86E-14 |
| Uneq. var. t : | 2,8469 | p (same mean): | 0,012365 | Uneq. var. t : | -13,412 | p (same mean): | 2,09E-16 |
| Monte Carlo permutation: | p (same mean): | 0,005 |  | Monte Carlo permutation: | p (same mean): | 0,0001 |  |

Table 4. t-test showing that size differences between sites are significant.

| Pygidial sagittal length for *Platypeltoides* (cm) | | |
| --- | --- | --- |
| Tamegroute | Bou Izargane | Ouled Slimane |
| 1.3 | 2.6 | 5,7 |
| 0.8 | 3.5 | 7,1 |
| 1.6 | 3.8 | 6,5 |
| 1.6 | 4.3 | 6 |
| 1 | 2.2 | 6,2 |
|  |  | 7 |
|  |  | 5,9 |
|  |  | 6,9 |
|  |  | 5,7 |

Table 5. Raw pygidial sagittal length in the studied localities.

| Summary statistics | | | | | |
| --- | --- | --- | --- | --- | --- |
| Tamegroute | | Bou Izargane | | Ouled Slimane | |
| N | 5 | N | 5 | N | 9 |
| Min | 0,8855 | Min | 2,2638 | Min | 5,7 |
| Max | 1,6709 | Max | 4,3428 | Max | 7,1 |
| Sum | 6,49056 | Sum | 16,5935 | Sum | 57 |
| Mean | 1,298112 | Mean | 3,3187 | Mean | 6,333333 |
| Std. error | 0,158821 | Std. error | 0,3823575 | Std. error | 0,186339 |
| Variance | 0,1261206 | Variance | 0,7309864 | Variance | 0,3125 |
| Stand. dev | 0,3551346 | Stand. dev | 0,8549774 | Stand. dev | 0,559017 |
| Median | 1,32386 | Median | 3,5112 | Median | 6,2 |
| 25 prcntil | 0,9394 | 25 prcntil | 2,45245 | 25 prcntil | 5,8 |
| 75 prcntil | 1,64395 | 75 prcntil | 4,0887 | 75 prcntil | 6,95 |
| Skewness | -0,133172 | Skewness | -0,1776892 | Skewness | 0,2802879 |
| Kurtosis | -2,713525 | Kurtosis | -1,867874 | Kurtosis | -1,78304 |
| Geom. mean | 1,257634 | Geom. mean | 3,226366 | Geom. mean | 6,311613 |
| Coeff. var | 27,35778 | Coeff. var | 25,76242 | Coeff. var | 8,826584 |

Table 6. Summary statistics on pygidial length in Tamegroute, Bou Izargane, and Ouled Slimane.

| Normality test | | | | | |
| --- | --- | --- | --- | --- | --- |
| Tamegroute | | Bou Izargane | | Ouled Slimane | |
| N | 5 | N | 5 | N | 9 |
| Shapiro-Wilk W | 0,8966 | Shapiro-Wilk W | 0,9536 | Shapiro-Wilk W | 0,8897 |
| p(normal) | 0,3913 | p(normal) | 0,7632 | p(normal) | 0,1982 |
| Anderson-Darling A | 0,2979 | Anderson-Darling A | 0,2096 | Anderson-Darling A | 0,4006 |
| p(normal) | 0,4268 | p(normal) | 0,7119 | p(normal) | 0,2836 |
| p(Monte Carlo) | 0,4901 | p(Monte Carlo) | 0,8075 | p(Monte Carlo) | 0,3012 |
| Jarque-Bera JB | 0,5935 | Jarque-Bera JB | 0,4602 | Jarque-Bera JB | 0,965 |
| p(normal) | 0,7432 | p(normal) | 0,7945 | p(normal) | 0,6172 |
| p(Monte Carlo) | 0,3947 | p(Monte Carlo) | 0,6023 | p(Monte Carlo) | 0,2444 |

Table 7. Normality test on pygidial lengths showing normal distributions.

| Significant differences | | | | | | | |
| --- | --- | --- | --- | --- | --- | --- | --- |
| Tamegroute vs Bou Izargane | | | | Bou Izargane vs Ouled slimane | | | |
| t : | -4,8803 | p (same mean): | 0,0012239 | t : | -8,0391 | p (same mean): | 3,58E-06 |
| Uneq. var. t : | -4,8803 | p (same mean): | 0,0038096 | Uneq. var. t : | -7,0875 | p (same mean): | 0,0004085 |
| Monte Carlo permutation: | p (same mean): | 0,0076 |  | Monte Carlo permutation: | p (same mean): | 0,0005 |  |
| Exact permutation: | p (same mean): | 0,0039683 |  | Exact permutation: | p (same mean): | 0,0004995 |  |

Table 8. t-test showing significant differences in pygidial lengths between sites.
